# Supplementary material for: Comprehensively understanding the distinct properties of crystal structure, phase transition and dielectrics in [M(crown)n]ReO4 (M+ = Na+, K+, NH4+; crown = 15-crown-5, 18-crown-6; n = 1 or 2)
Source: Royal Society of Chemistry journal article supplement (doi:10.1039/d4ce00435c), 2024-01-01
Supplement: d4ce00435c1.pdf [file d4ce00435c1.pdf]

**Comprehensively understanding the distinct properties of  
crystal structure, phase transition and dielectrics in  
[M(crown)<sub>n</sub>]ReO<sub>4</sub> (M<sup>+</sup> = Na<sup>+</sup>, K<sup>+</sup>, NH<sub>4</sub><sup>+</sup>; crown = 15-crown-5,  
18-crown-6; n = 1 or 2)**

Guo-Jun Yuan<sup>\*ab</sup> Xue-Wei Pan<sup>b</sup> Yan Gao<sup>b</sup> You-Fang Jiang<sup>c</sup> Li Li<sup>a</sup> Xiao-Ming Ren<sup>\*b</sup>

<sup>a</sup> Department of Chemistry, Nanjing Xiaozhuang University, Nanjing 211171, P. R. China

<sup>b</sup> State Key Laboratory of Materials-Oriented Chemical Engineering and College of Chemistry and molecular of Engineering, Nanjing Tech University, Nanjing 211816, P. R. China

<sup>c</sup> Jingde Ziyang School of Anhui Province, XuanCheng 242600, P. R. China

Tel.: +86 25 58139476

Email: [ahchljygj@163.com](mailto:ahchljygj@163.com) (GJY); [xmren@njtech.edu.cn](mailto:xmren@njtech.edu.cn) (XMR)

## Contents

Fig. S1: Comparison of simulated and experimental Powder X-ray diffraction profiles for **1–3**.

Fig. S2: Packing diagram (a) viewed along the *b*- and (b) *c*-axes, respectively, for **2** at 296 K, where the green dash lines represent the weaker H-bonding interactions between the O atoms of anion and the H atoms of crown-ether ring.

Fig. S3: (a) An asymmetric unit with non-hydrogen atom labeling (the thermal ellipsoids are drawn at 30% probability level), (b) one dimensional (1D) supramolecular chain, (c) illustration of H-bonds, (d-f) Packing diagram viewed along the *a*-, *b*- and *c*-axes, respectively, for **2** at 108 K.

Fig. S4: Packing diagram viewed along (a) the *a*- and *b*-axes for **3** at 296 K, where the green dash lines represent the weaker H-bonding interactions between the O atoms of anion and the H atoms of crown-ether ring.

Fig. S5: (a) Dimer structure for **3** at 108 K; (b–d) Packing diagram viewed along the *a*-, *b*- and *c*-axes for **3** at 108 K.

Fig. S6: (a) Plots of  $\epsilon'$  vs. temperature in the 153–470 K range for **1**; (b) Plots of  $\epsilon'$  vs. temperature in the 153–450 K range for **2**; (c) Plots of  $\epsilon'$  vs. temperature in the 153–450 K range for **3**.

Fig. S7: Plot of  $\ln(1/\tau)$  vs.  $1000/T$  in the 153–470 K range for **1**, where the solid squares represent the experimental data, and the red line is reproduced by fitted parameters.

Fig. S8: Variable-temperature PXRD patterns of **3** at the selected temperatures, corresponding to three different phases, respectively.

Table S1: Selected bond lengths / Å for **1** at 296 K

Table S2: Selected bond lengths / Å for **2** at 296 K

Table S3: Selected bond lengths / Å for **2** at 108 K

Table S4: Selected bond lengths / Å for **3** at 296 K

Table S5: Selected bond lengths / Å for **3** at 108 K

Table S6: The value of  $\Delta H$ ,  $\Delta S$  and  $N$  at the selected temperature for **1–3**

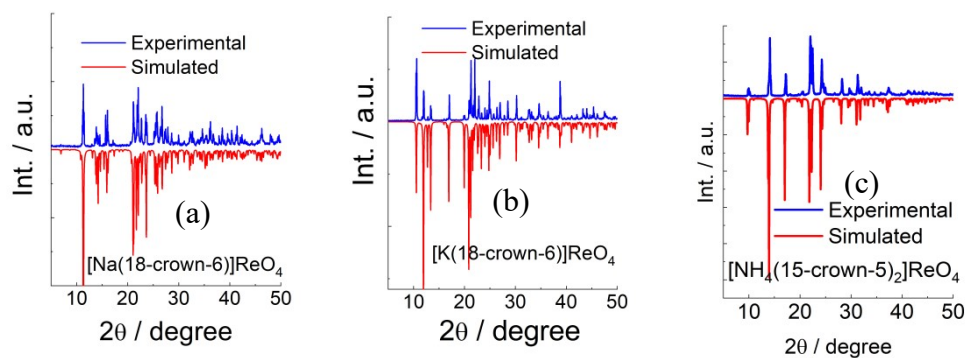

Fig. S1: Comparison of simulated and experimental Powder X-ray diffraction profiles for 1–3.

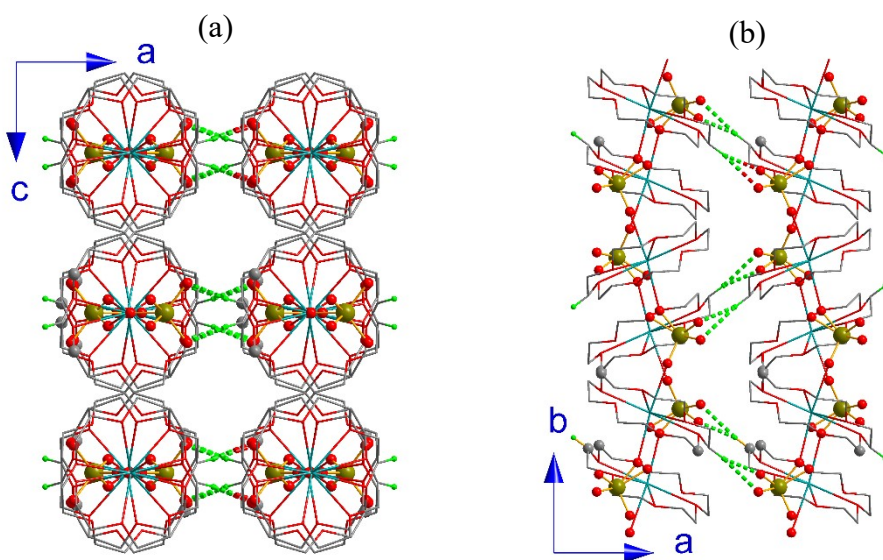

Fig. S2: Packing diagram (a) viewed along the  $b$ - and (b)  $c$ -axes, respectively, for **2** at 296 K, where the green dash lines represent the weaker H-bonding interactions between the O atoms of anion and the H atoms of crown-ether ring.

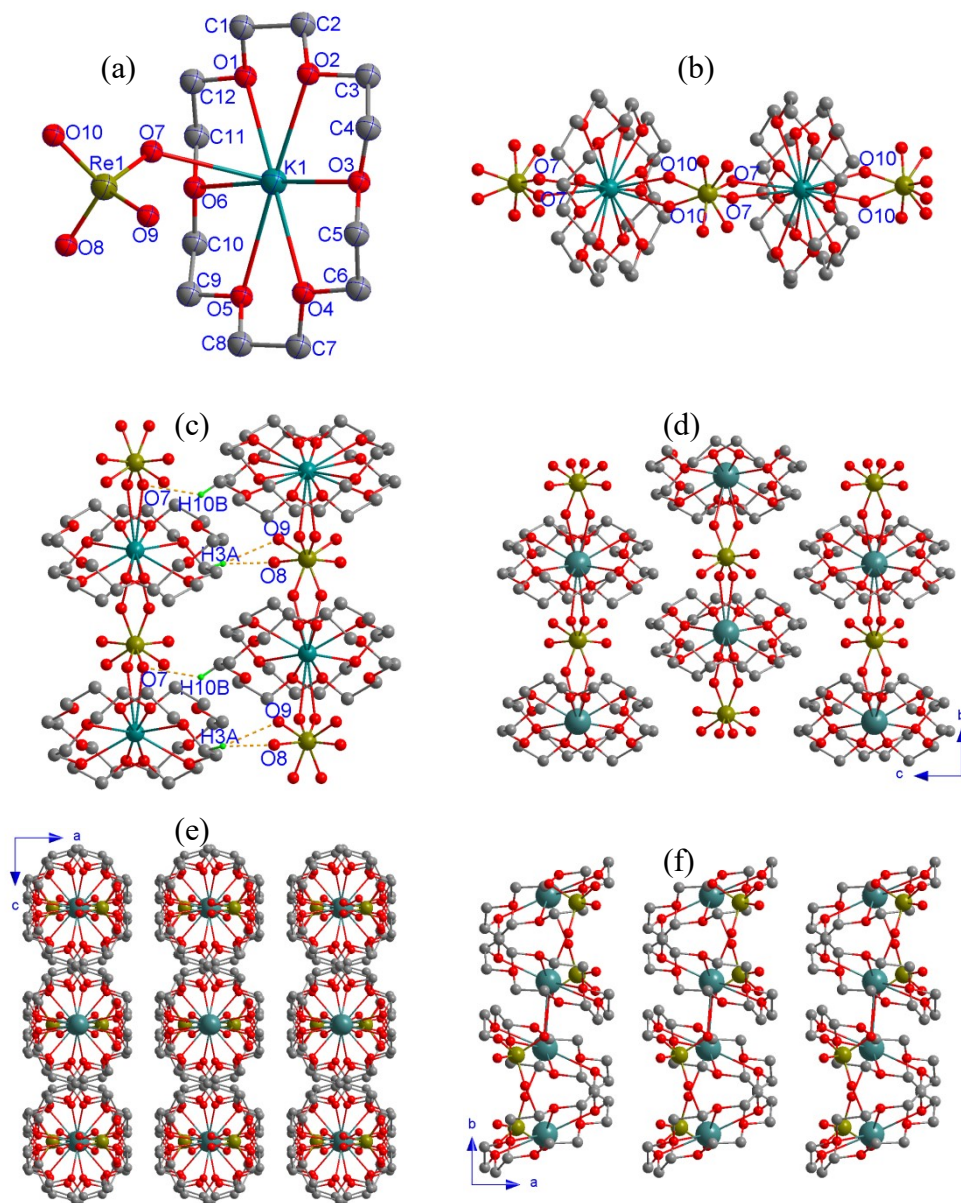

Fig. S3: (a) An asymmetric unit with non-hydrogen atom labeling (the thermal ellipsoids are drawn at 30% probability level), (b) one dimensional (1D) supramolecular chain, (c) illustration of H-bonds, (d-f) Packing diagram viewed along the *a*-, *b*- and *c*-axes, respectively, for **2** at 108 K.

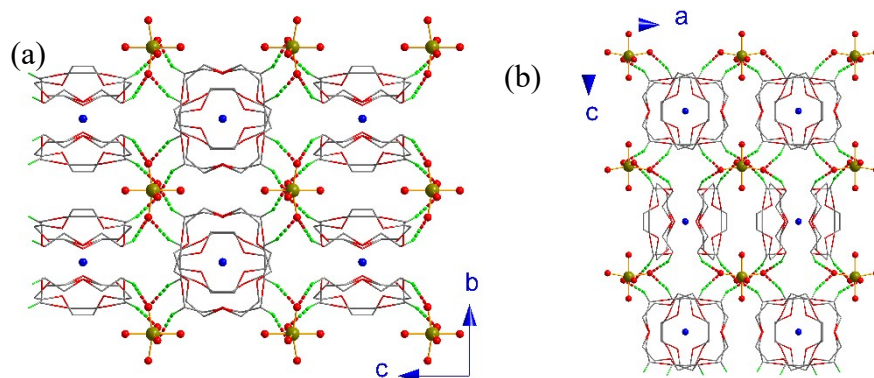

Fig. S4: Packing diagram viewed along (a) the *a*- and *b*-axes for **3** at 296 K, where the green dash lines represent the weaker H-bonding interactions between the O atoms of anion and the H atoms of crown-ether ring.

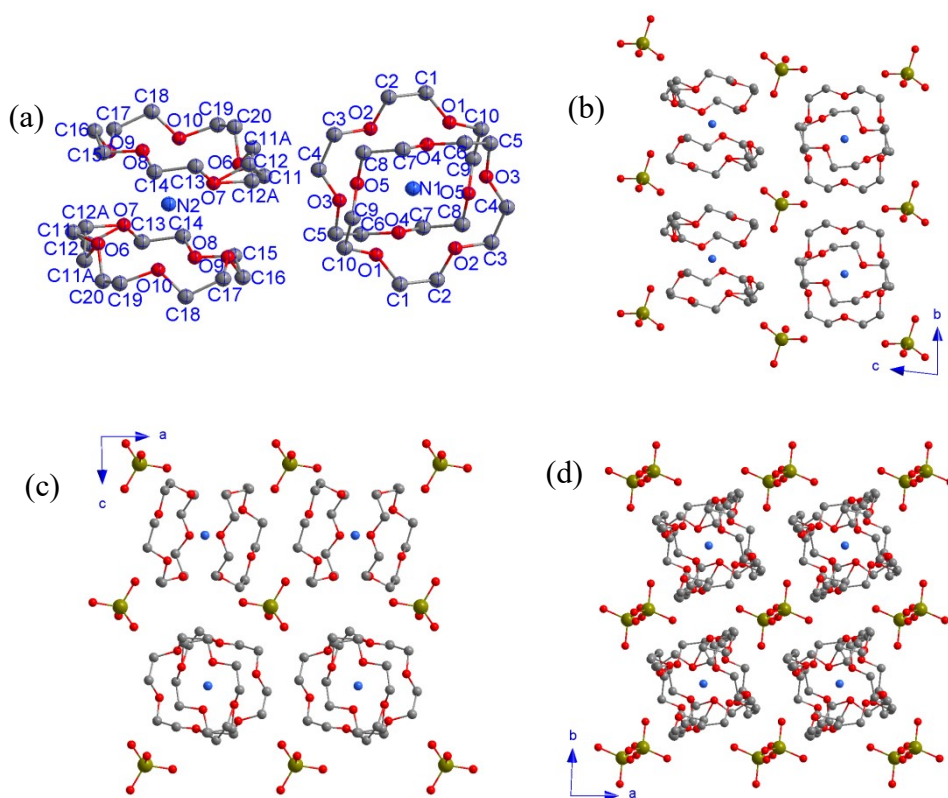

Fig. S5: (a) Dimer structure for **3** at 108 K; (b–d) Packing diagram viewed along the *a*-, *b*- and *c*-axes for **3** at 108 K.

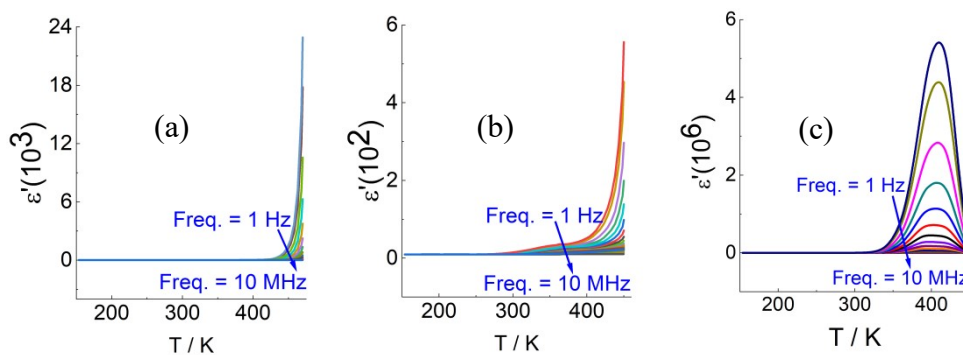

Fig. S6: (a) Plots of  $\epsilon'$  vs. temperature in the 153–470 K range for **1**; (b) Plots of  $\epsilon'$  vs. temperature in the 153–450 K range for **2**; (c) Plots of  $\epsilon'$  vs. temperature in the 153–450 K range for **3**.

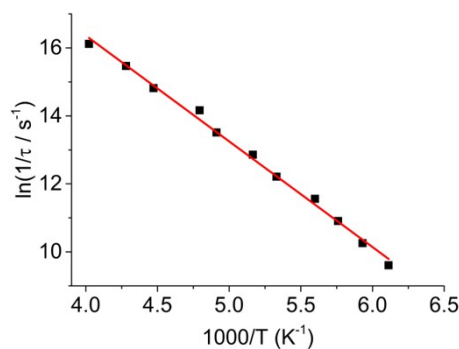

Fig. S7: Plot of  $\ln(1/\tau)$  vs.  $1000/T$  in the 153–470 K range for **1**, where the solid squares represent the experimental data, and the red line is reproduced by fitted parameters.

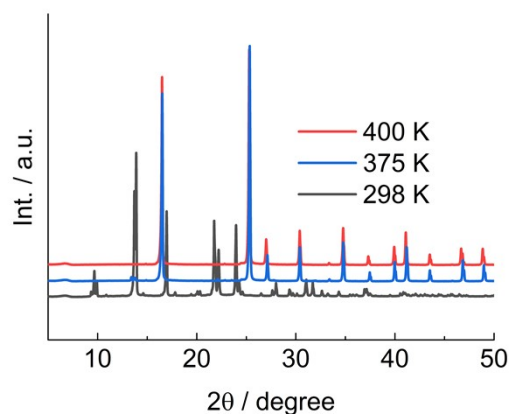

Fig. S8: Variable-temperature PXRD patterns of **3** at the selected temperatures, corresponding to three different phases, respectively.

Table S1: Selected bond lengths / Å for **1** at 296 K

| Bond        | Bond lengths | Bond        | Bond lengths |
|-------------|--------------|-------------|--------------|
| Na(1)-O(1)  | 2.8483(8)    | Na(2)-O(7)  | 2.3878(5)    |
| Na(1)-O(2)  | 2.5845(5)    | Na(1)-O(10) | 2.4254(5)    |
| Na(1)-O(3)  | 2.7014(5)    | Re(1)-O(7)  | 1.7355(5)    |
| Na(2)-O(4)  | 2.7641(6)    | Re(1)-O(8)  | 1.7219(6)    |
| Na(2)-O(5)  | 2.7433(6)    | Re(1)-O(9)  | 1.7121(6)    |
| Na(2)-O(6)  | 2.6452(3)    | Re(1)-O(10) | 1.7170(5)    |
| Na(2)-O(6)A | 2.6496(3)    |             |              |

Table S2: Selected bond lengths / Å for **2** at 296 K

| Bond      | Bond lengths | Bond        | Bond lengths |
|-----------|--------------|-------------|--------------|
| K(1)-O(1) | 2.8449(2)    | K(1)-O(7)   | 2.7739(2)    |
| K(1)-O(2) | 2.9396(2)    | Re(1)-O(7)  | 1.7143(2)    |
| K(1)-O(3) | 2.9109(2)    | Re(1)-O(8)  | 1.7180(3)    |
| K(1)-O(4) | 2.8030(2)    | Re(1)-O(8)A | 1.7517(3)    |
| K(1)-O(5) | 2.6593(2)    | Re(1)-O(9)  | 1.8378(5)    |
| K(1)-O(6) | 2.7184(2)    | Re(1)-O(9)A | 1.6597(5)    |

Table S3: Selected bond lengths / Å for **2** at 108 K

| Bond      | Bond lengths | Bond        | Bond lengths |
|-----------|--------------|-------------|--------------|
| K(1)-O(1) | 2.8257(2)    | K(1)-O(7)   | 2.8311(1)    |
| K(1)-O(2) | 2.7240(1)    | K(1)-O(10)  | 2.7302(1)    |
| K(1)-O(3) | 2.6905(1)    | Re(1)-O(7)  | 1.7459(1)    |
| K(1)-O(4) | 2.8316(1)    | Re(1)-O(8)  | 1.7171(1)    |
| K(1)-O(5) | 2.9405(1)    | Re(1)-O(9)  | 1.749(1)     |
| K(1)-O(6) | 2.8920(1)    | Re(1)-O(10) | 1.7330(1)    |

Table S4: Selected bond lengths / Å for **3** at 296 K

| Bond       | Bond lengths | Bond       | Bond lengths |
|------------|--------------|------------|--------------|
| N(1)-O(1)  | 3.1916(2)    | N(1)-O(3)  | 3.1208(6)    |
| N(1)-O(1)A | 2.8702(2)    | N(1)-O(3)A | 2.9766(6)    |
| N(1)-O(2)  | 3.1313(2)    | Re(1)-O(4) | 1.7566(5)    |
| N(1)-O(2)A | 2.7989(3)    | Re(1)-O(5) | 1.7761(3)    |

Table S5: Selected bond lengths / Å for **3** at 108 K

| Bond      | Bond lengths | Bond        | Bond lengths |
|-----------|--------------|-------------|--------------|
| N(1)-O(1) | 2.9320(5)    | N(2)-O(8)   | 3.1172(5)    |
| N(1)-O(2) | 3.0052(5)    | N(2)-O(9)   | 2.8666(5)    |
| N(1)-O(3) | 2.8485(5)    | N(2)-O(10)  | 2.9858(5)    |
| N(1)-O(4) | 3.0295(5)    | Re(1)-O(11) | 1.7015(7)    |
| N(1)-O(5) | 3.0436(5)    | Re(1)-O(12) | 1.7142(5)    |
| N(2)-O(6) | 2.9146(6)    | Re(1)-O(13) | 1.7270(5)    |
| N(2)-O(7) | 3.0156(6)    | Re(1)-O(14) | 1.7077(6)    |

Table S6: The value of  $\Delta H$ ,  $\Delta S$  and N at the selected temperature for **1–3**

|                                                   | <b>1</b> | <b>2</b> | <b>3</b> | <b>3</b> |
|---------------------------------------------------|----------|----------|----------|----------|
| Temp. (K)                                         | 436      | 360      | 289      | 352      |
| $\Delta H$ (kJ mol <sup>-1</sup> )                | 16.11    | 21.02    | 4.28     | 3.38     |
| $\Delta S$ (J K <sup>-1</sup> mol <sup>-1</sup> ) | 36.95    | 58.38    | 14.80    | 9.61     |
| N                                                 | 85.1     | 1120.9   | 5.9      | 3.2      |
